# Supplementary material for: Assessing Behavior Similarity of Mineral Raw Material Prices through a Feature-Based Clustering Approach
Source: MDPI journal article supplement (doi:10.3390/materproc2021005037), 2021-11-30
Supplement: s1 [file s1]

## Supplementary Materials

**Table S1.** List of features used to describe the selected time series.

| Feature                         | Description                                                                                                |
|---------------------------------|------------------------------------------------------------------------------------------------------------|
| Price mean                      | Mean value of scaled time series                                                                           |
| Price median                    | Median value of scaled time series                                                                         |
| Price standard deviation        | Standard deviation of scaled time series                                                                   |
| Price longest strike below mean | The length of the longest consecutive subsequence in each scaled time series that is smaller than the mean |
| Price longest strike above mean | The length of the longest consecutive subsequence in each scaled time series that is bigger than the mean  |
| Price first location of max     | The relative location of maximum value                                                                     |
| Price ratio beyond 0.5 sigma    | Ratio of values exceeding 0.5 standard deviation                                                           |
| Price ratio beyond 1 sigma      | Ratio of values exceeding 1 standard deviation                                                             |
| Price ratio beyond 1.5 sigma    | Ratio of values exceeding 1.5 standard deviation                                                           |
| Price ratio beyond 2 sigma      | Ratio of values exceeding 2 standard deviations                                                            |
| Price ratio beyond 2.5 sigma    | Ratio of values exceeding 2.5 standard deviations                                                          |
| Price ratio beyond 3 sigma      | Ratio of values exceeding 3 standard deviations                                                            |
| Price ratio beyond 4 sigma      | Ratio of values exceeding 4 standard deviations                                                            |
| Price skewness                  | Skewness of the scaled time series                                                                         |
| Price kurtosis                  | Kurtosis of the scaled time series                                                                         |
| Price count above mean          | Number of values above mean value                                                                          |
| Price count below mean          | Number of values below mean value                                                                          |
| Price first location of min     | The relative location of minimum value                                                                     |
| Price linear “intercept”        | Intercept value of the linear least-squares fitting of the scaled time series versus time                  |
| Price linear “slope”            | Beta coefficient of the linear least-squares fitting of the scaled time series versus time                 |
| Price sum values                | Sum of scaled time series values                                                                           |

**Table S2.** Pearson correlation matrix of the min–max scaled prices.

|                  | Alumi-<br>num | Iron<br>ore | Copper | Lead | Tin  | Nickel | Zinc | Gold | Platinum | Silver | Crude<br>oil | Aus.<br>Coal | Uranium |
|------------------|---------------|-------------|--------|------|------|--------|------|------|----------|--------|--------------|--------------|---------|
| <b>Aluminum</b>  | 1             |             |        |      |      |        |      |      |          |        |              |              |         |
| <b>Iron ore</b>  | 0.72          | 1           |        |      |      |        |      |      |          |        |              |              |         |
| <b>Copper</b>    | 0.81          | 0.90        | 1      |      |      |        |      |      |          |        |              |              |         |
| <b>Lead</b>      | 0.72          | 0.84        | 0.93   | 1    |      |        |      |      |          |        |              |              |         |
| <b>Tin</b>       | 0.62          | 0.85        | 0.92   | 0.92 | 1    |        |      |      |          |        |              |              |         |
| <b>Nickel</b>    | 0.86          | 0.71        | 0.76   | 0.69 | 0.56 | 1      |      |      |          |        |              |              |         |
| <b>Zinc</b>      | 0.77          | 0.61        | 0.82   | 0.81 | 0.70 | 0.73   | 1    |      |          |        |              |              |         |
| <b>Gold</b>      | 0.47          | 0.76        | 0.86   | 0.84 | 0.92 | 0.44   | 0.66 | 1    |          |        |              |              |         |
| <b>Platinum</b>  | 0.77          | 0.90        | 0.91   | 0.85 | 0.85 | 0.76   | 0.63 | 0.74 | 1        |        |              |              |         |
| <b>Silver</b>    | 0.59          | 0.85        | 0.90   | 0.84 | 0.92 | 0.56   | 0.62 | 0.92 | 0.85     | 1      |              |              |         |
| <b>Crude oil</b> | 0.74          | 0.88        | 0.90   | 0.84 | 0.86 | 0.69   | 0.62 | 0.74 | 0.94     | 0.84   | 1            |              |         |
| <b>Aus. Coal</b> | 0.71          | 0.85        | 0.86   | 0.85 | 0.89 | 0.56   | 0.62 | 0.77 | 0.82     | 0.80   | 0.85         | 1            |         |
| <b>Uranium</b>   | 0.79          | 0.76        | 0.77   | 0.75 | 0.61 | 0.89   | 0.67 | 0.50 | 0.79     | 0.61   | 0.73         | 0.63         | 1       |

**Table S3.** Loadings of original variables.

| <b>Variable</b>                 | <b>PC1</b> | <b>PC2</b> | <b>PC3</b> |
|---------------------------------|------------|------------|------------|
| Price mean                      | -0.26      | 0.24       | 0.00       |
| Price median                    | -0.10      | 0.41       | -0.11      |
| Price standard deviation        | -0.27      | -0.01      | 0.25       |
| Price longest strike below mean | -0.12      | -0.39      | 0.10       |
| Price longest strike above mean | -0.12      | -0.35      | -0.18      |
| Price first location of max     | -0.16      | -0.19      | 0.21       |
| Price ratio beyond 0.5 sigma    | -0.24      | -0.28      | -0.04      |
| Price ratio beyond 1 sigma      | -0.23      | 0.14       | -0.26      |
| Price ratio beyond 1.5 sigma    | 0.03       | 0.26       | 0.45       |
| Price ratio beyond 2 sigma      | 0.22       | 0.11       | 0.25       |
| Price ratio beyond 2.5 sigma    | 0.28       | 0.08       | 0.05       |
| Price ratio beyond 3 sigma      | 0.27       | -0.14      | -0.21      |
| Price ratio beyond 4 sigma      | 0.25       | -0.12      | -0.20      |
| Price skewness                  | 0.31       | -0.07      | 0.02       |
| Price kurtosis                  | 0.30       | -0.07      | -0.12      |
| Price count above mean          | -0.18      | 0.09       | -0.39      |
| Price count below mean          | 0.18       | -0.09      | 0.39       |
| Price first location of min     | 0.00       | -0.17      | -0.20      |
| Price linear “intercept”        | 0.15       | 0.36       | -0.19      |
| Price linear “slope”            | -0.29      | -0.14      | 0.16       |
| Price sum values                | -0.26      | 0.24       | 0.00       |

**Table S4.** PCA Scores of the different commodities.

| <b>Commodity</b>   | <b>PC1</b> | <b>PC2</b> | <b>PC3</b> |
|--------------------|------------|------------|------------|
| Aluminum           | 1.10       | 5.68       | 0.03       |
| Coal, Australian   | 1.49       | -0.19      | 0.17       |
| Copper             | -4.79      | -0.10      | -2.13      |
| Crude oil, average | -1.24      | 1.73       | 1.07       |
| Gold               | -3.74      | -2.93      | 1.99       |
| Iron ore           | 1.37       | 0.02       | 3.88       |
| Lead               | -2.68      | -0.98      | -1.53      |
| Nickel             | 6.02       | -0.34      | -1.02      |
| Platinum           | -1.83      | 2.51       | -0.28      |
| Silver             | 1.07       | -1.80      | 0.50       |
| Tin                | -2.64      | -1.69      | -0.45      |
| Uranium            | 5.63       | -2.49      | -1.24      |
| Zinc               | 0.24       | 0.59       | -0.99      |
